# Supplementary material for: Tocotrienols Attenuate White Adipose Tissue Accumulation and Improve Serum Cholesterol Concentration in High-Fat Diet-Treated Mice
Source: MDPI journal article supplement (doi:10.3390/molecules27072188), 2022-03-28
Supplement: s1 [file s1]

**Table S1. Diet compositions.**

|                                       | D12492 |      | D12450J |        | Mineral Mix S10026                                                    |         |            |                  |
|---------------------------------------|--------|------|---------|--------|-----------------------------------------------------------------------|---------|------------|------------------|
|                                       | g      | kcal | g       | kcal   |                                                                       | g       | Amt in 10g |                  |
| Protein                               | 26     | 20   | 19.2    | 20     | Sodium Chloride                                                       | 259     | 1.0g       | Na               |
| Carbohydrate                          | 26     | 20   | 67.3    | 70     |                                                                       |         | 1.6g       | Cl               |
| Fat                                   | 35     | 60   | 4.3     | 10     | Magnesium Oxide, Heavy, DC USP                                        | 41.9    | 0.5g       | Mg               |
| Total                                 |        | 100  |         | 100    | Magnesium Sulfate, Heptahydrate                                       | 257.6   | 0.33g      | S                |
| kcal/g                                | 5.24   |      | 3.85    |        | Ammonium Molybdate Tetrahydrate                                       | 0.3     | 1.6mg      | Mo               |
|                                       | D12492 |      | D12450J |        | Chromium Posstasium Sulfate <td>1.925</td> <td>2.0mg</td> <td>Cr</td> | 1.925   | 2.0mg      | Cr               |
|                                       | g      | kcal | g       | kcal   | Copper Carbonate <td>1.05</td> <td>6.0mg</td> <td>Cu</td>             | 1.05    | 6.0mg      | Cu               |
| Casein, 30 Mesh                       | 200    | 800  | 200     | 800    | Ferric Citrate                                                        | 21      | 37mg       | Fe               |
| L-Cystine                             | 3      | 12   | 3       | 12     | Manganase Carbqnate Hydrate                                           | 12.25   | 59mg       | Mn               |
|                                       |        |      |         |        | Potassium Iodate                                                      | 0.035   | 0.2mg      | I                |
| corn Starch                           | 0      | 0    | 506.2   | 2024.8 | Sodium Fluoride                                                       | 0.2     | 0.9mg      | Fl               |
| Maltodextrin 10                       | 125    | 500  | 125     | 500    | Sodium Selenite                                                       | 0.035   | 0.16mg     | Se               |
| Sucrose                               | 68.8   | 275  | 68.8    | 275.2  | Zinc Carbonate                                                        | 5.6     | 29mg       | Zn               |
|                                       |        |      |         |        | Sucrose                                                               | 399.105 | 3.9911     |                  |
| Cellulose, BW200                      | 50     | 0    | 50      | 0      |                                                                       |         |            |                  |
|                                       |        |      |         |        | Total                                                                 | 1000    |            |                  |
| Soybean Oil                           | 25     | 225  | 25      | 225    | Vitamin Mix V10001                                                    |         |            |                  |
| Lard                                  | 245    | 2205 | 20      | 180    |                                                                       | g       | Amt in 10g |                  |
|                                       |        |      |         |        | Vitamin A Acetate                                                     | 0.8     | 4000 IU    | Vitamin A        |
| Mineral Mix S10026                    | 10     | 0    | 10      | 0      | (500,000 IU/g)                                                        |         |            |                  |
| DiCalcium Phosphate                   | 13     | 0    | 13      | 0      | Vitamin D3                                                            | 1       | 1000 IU    | Vitamin D3       |
| Calcium Carbonate                     | 5.5    | 0    | 5.5     | 0      | (100,00 IU/g)                                                         |         |            |                  |
| Potassium Citrate, 1 H <sub>2</sub> O | 16.5   | 0    | 16.5    | 0      | Vitamin E Acetate                                                     | 10      | 50 IU      | Vitamin E        |
|                                       |        |      |         |        | 500 IU/g                                                              |         |            |                  |
| Vitamin Mix V10001                    | 10     | 40   | 10      | 40     | Menadione Sodium Bisulfite                                            | 0.08    | 0.5 mg     | Menadione        |
| Choline Bitartrate                    | 2      | 0    | 2       | 0      | 62.5% Menadione                                                       |         |            |                  |
|                                       |        |      |         |        | Biotine, 1.0%                                                         | 2       | 0.2 mg     | Biotine          |
| FD&C Blue Dye #1                      | 0.05   | 0    |         |        | Cyanocobalamin, 0.1%                                                  | 1       | 10 µg      | Vitamin B12      |
| FD&Yellow Dye #5                      |        |      | 0.04    | 0      | Follic Acid                                                           | 0.2     | 2 mg       | Follic acid      |
|                                       |        |      |         |        | Nicotinnic Acid                                                       | 3       | 30 mg      | Niacin           |
| Total                                 | 773.85 | 4057 | 1055.05 | 4057   | Calcium Pantothenate                                                  | 1.6     | 16 mg      | Pantothenic Acid |
|                                       |        |      |         |        | Pyridoxine-HCl                                                        | 0.7     | 7 mg       | Vitamin B6       |
|                                       |        |      |         |        | Riboflavin                                                            | 0.6     | 6 mg       | Vitamin B2       |
|                                       |        |      |         |        | Thiamin-HCl                                                           | 0.6     | 6 mg       | Vitamin B12      |
|                                       |        |      |         |        | Sucrose                                                               | 978.42  |            |                  |
|                                       |        |      |         |        |                                                                       |         |            |                  |
|                                       |        |      |         |        | Total                                                                 | 1000    |            |                  |
|                                       |        |      |         |        | Vitamin E = dl-α-tocopherol acetate                                   |         |            |                  |

Vitamin E = dl- $\alpha$ -tocopherol acetate
